# Supplementary material for: Inhibition of peripheral serotonin synthesis by a gut microbe-derived TPH1 inhibitor, hyodeoxycholic acid, alleviates irritable bowel syndrome
Source: Research Square preprint supplement (doi:10.21203/rs.3.rs-6769911/v1), 2025-07-18
Supplement: Supplementary file 1 [file 3d7dc8617f11283c5cc1c76a.xlsx]

## Sheet: Supplementary Dataset
Supplementary Dataset
Table.S1	Reagent and resource used in this study, related to Materials and Method
Table.S2	MRM transition and parameters for metabolites quantification, related to Materials and Method
Table.S3	Correlation between bile acid species with gastrointestinal symptoms in IBS-D patients, related to Figure.1
Table.S4	Correlation between HCA species with gastrointestinal symptoms in IBS-D patients, related to Figure.1
Table S5	Correlation between HDCA with gastrointestinal symptoms in IBS-D patients, related to Figure 2
Table.S6	Comparison of binding energy of HDCA, THDCA and GHDCA with TPH1(5JD6) in molecular docking, related to Figure.7

## Sheet: Table.S1
Table S1. Reagent and resource used in this study, Related to Materials and Method
REAGENT or RESOURCE	SOURCE	IDENTIFIER
Antibodies
Goat pAb Serotonin	Abcam	Cat# Ab66047
Rabbit mAb to Chromogranin A	Abcam	Cat# Ab254322
Alexa 488 Anti-rabbit	Invitrogen	Cat# A11008
Alexa 568 Anti-goat	Invitrogen	Cat# A11079
Biological samples
Mice serum	C57BL/6J male mice	N/A
Mice feces	C57BL/6J male mice	N/A
Mice ileum tissues	C57BL/6J male mice	N/A
Mice proximal colon tissues	C57BL/6J male mice	N/A
Mice colon segment samples	C57BL/7J male mice	N/A
Human colon segment sample	N/A	N/A
Human serum	Clinical trials	N/A
Human feces	Clinical trials	N/A
Chemicals and reagents
Taurochenodeoxycholic Acid(TCDCA)	Avanti	Cat# 700249P-10MG-B-010
Taurodehydrocholic Acid(TDHCA)	Avanti	Cat# 700242P-1MG-B-010
Lithocholic acid(LCA)	SIGMA	Cat# L6250
isolithocholic Acid(iso-LCA)	Avanti	Cat# 700195P-10MG-D-010
Sodium deoxycholate(DCA)	SIGMA	Cat# D6750
Cholic acid(CA)	SIGMA	Cat# C1129
Sodium chenodeoxycholate(CDCA)	SIGMA	Cat# C8261
Hyocholic Acid(HCA)	Aladdin Scientific	Cat# H489620-5g
Hyodeoxycholic acid(HDCA)	SIGMA	Cat# H3878-5G
Glycohyocholic Acid(GHCA)	Cayman	Cat# 22670
Glycohyodeoxycholic acid(GHDCA)	Macklin	Cat# G922890-5mg
Taurohyocholic Acid (sodium salt)(THCA)	Cayman	Cat# 22669
Sodium taurohyodeoxycholate hydrate(THDCA)	SIGMA	Cat# T0682
Ursodeoxycholic acid(UDCA)	SIGMA	Cat# U5127
Allocholic Acid(ACA)	Avanti	Cat# 700213P-5MG-A-010
Glycochenodeoxycholic Acid(GCDCA)	Avanti	Cat# 700266P-10MG-C-010
Taurolithocholic Acid sodium salt(TLCA)	Avanti	Cat# 700252P-10MG-C-010
12-Ketodeoxycholic Acid(12-KLCA)	SIGMA	Cat# SMB00913-25MG
Alloisolithocholic Acid(IsoalloLCA)	Cayman	Cat# 29542
Dehydrolithocholic Acid(3-oxoLCA)	Cayman	Cat# 29544
Tauroursodeoxycholic Acid (sodium salt hydrate)(TUDCA)	Cayman	Cat# 9003379
Isodeoxycholic Acid(iso-DCA)	Cayman	Cat# 29890
Nordeoxycholic Acid(23-NDCA)	Cayman	Cat# 30837
Glycocholic acid hydrate(GCA)	SIGMA	Cat# G2878
Sodium taurocholate hydrate(TCA)	SIGMA	Cat# 86339
Sodium glycodeoxycholate(GDCA)	SIGMA	Cat# G9910
Sodium taurodeoxycholate hydrate(TDCA)	SIGMA	Cat# T0875
Glycoursodeoxycholic acid(GUDCA)	SIGMA	Cat# 863
Glycolithocholic Acid(GLCA)	SIGMA	Cat# 700268P-10MG
5-Hydroxy-L-tryptophan (5-HTP)	SIGMA	Cat# H9772
Serotonin hydrochloride (5-HT)	SIGMA	Cat# H9523
Cholic acid-d4	MCE	Cat# HY-N0324S
Deoxycholic acid-d4	MCE	Cat# HY-N0593S
L-Tryptophan-d5	MCE	Cat# HY-N0623S
LX-1031, TPH1 inhibitor	Abcam	Cat# ab269814
Forskolin	MCE	Cat#HY-15371
Resveratrol	MCE	Cat#HY-16561
GW4064	MCE	Cat#HY-50108
NDB	MCE	Cat#HY-138937
Tauro-β-muricholic acid	MCE	Cat#HY-135103
GSK1292263	MCE	Cat#HY-12066
MEX-2982	MCE	Cat#HY-15291
Calcitriol	MCE	Cat#HY-10002
Calcifediol	MCE	Cat#HY-32351
SBI-115	MCE	Cat#HY-111534
INT777	MCE	Cat#HY-15677
GW3965	MCE	Cat#HY-10627A
GSK2033	MCE	Cat#HY-108688
TPH1 Inhibitor Screening Assay Kit	BPS Bioscience	Cat#72056
TIANamp Stool DNA Kit	TIANGEN	Cat#4992205
Pierce™ BCA Protein Assay Kits	Thermo Fisher	Cat#23225
Ampicillin	SIGMA	SKU# A9393
Metronidazole	SIGMA	SKU# M1547
Vancomycin	SIGMA	SKU# V2002
Neomycin	SIGMA	SKU# N6386
Streptomycin	SIGMA	SKU# S9137
Carmine	SIGMA	SKU# C1022
Kanamycin	SIGMA	SKU# K1377
DAPI	Cell Signaling	Cat #4083
Enhanced chemiluminescence	Thermo Fisher	Cat# WBKLS0500
Refined PULVIS FELLIS SUIS	Solarbio	Cat# G8310
Cell study
QGP-1	AcceGen	ABC-TC0918, RRID:CVCL_3143
HEK293T	ATCC	CRL‐3216
RPMI Medium 1640	Gibco	Cat# 31800-022
DMEM	Gibco	Cat# 12100-046
Sodium bicarbonate	Acros Organics	Cat# AC123360010
Fetal bovine serum	Gibco	Cat# #10099
Penicillin-streptomycin(5000U/mL)	Gibco	Cat# LA1090
Phenylmethylsulfonyl fluoride (PMSF)	Solarbio	Cat# P0100
Biological specimen
Mice intestinal segment samples	N/A	N/A
Mice serum samples	N/A	N/A
Human colonic segment samples	N/A	N/A
Human serum samples	N/A	NCT02822677 and NCT03457324
Human fecal samples	N/A	NCT02822677 and NCT03457324
Animal study
C57BL/6J male mice	N/A	N/A
Germ-free C57BL/6J mice	Nanjing GemPharmatech Co.	N/A
Suis Fellis Pulvis	Solarbio	Cat# LA1090
2,4,6-trinitrobenzene sulfonic acid (TNBS)	Sigma	Cat# p2297
alosetron hydrochloride	Alladin	Cat# A135530
Carmine	Macklin	Cat# C805213
Sodium carboxymethyl cellulose	Chem Scene	Cat# CS-0015715
Ethanol	Honeywell	Cat# 32221-2.5L
Primer
TPH1 F	BGI	CTAGCTAGCATGATTGAAGACAATAAGG
TPH1 R	BGI	CGCGGATCCGATACTCGGCTTCCTGCTG
L236 F	BGI	TTGGTGATGCGTAACCAGCCACAGGACGGA
L236 R	BGI	TGGTTACGCATCACCAAGAGATTTCTTATCAGGTTT
F313 F	BGI	CAGTGAAAGCGTAGCACGTTGCCAGTTTTTGA
F313 R	BGI	GTGCTACGCTTTCACTGTGGAGTTTGGTCTATGTAA
P268 F	BGI	TATCTGCCTCTGGGGTATAGAAGGGATCTGA
P268 R	BGI	TACCCCAGAGGCAGATACCTGCCATGAACTCTTAGGTC
P238 F	BGI	CTTGCTGATAAGTAACCAGCCACAGGACG
P238 R	BGI	GGTTACTTATCAGCAAGAGATTTCTTATCAGGTTTAGCCTTT
Y312 F	BGI	TGAAAAAGGCGCACGTTGCCAGTTTTTGAAC
Y312 R	BGI	AACGTGCGCCTTTTTCACTGTGGAGTTTGGTCTATG
241 A F	BGI	AGAGATGCCTTATCAGGTTTAGCCTTTCGAGTTT
241 A R	BGI	CCTGATAAGGCATCTCTTGGTGATAAGTAACCAGCC
364 A F	BGI	CAGGAAGCTCTTATCACAACTTTTCAAGATGTCTACTTT
364 A R	BGI	GTGATAAGACGTTCCTGTTTGCAGGTAATCTTGG
Bacterial and virus strains
Escherichia coli DH5α	Thermo Scientific	EC0112
Plasmid
pMD2.G	MiaoLingBio	P0262
psPAX2	MiaoLingBio	P0261
pLV3-CMV-MCS-3×FLAG-Puro	MiaoLingBio	P30780
pCR-BluntII-TOPO-TPH1(human)	MiaoLingBio	P21375
Enzyme
NheI-HF	NEB	R3131S
BamHI	NEB	R0136S
T4 DNA Ligase	NEB	M0202S
DpnI	NEB	R0176S
Phusion® High-Fidelity PCR Master Mix with HF Buffer	NEB	M0531S
Software
Prism 8	GraphPad	N/A
R Software	https://www.r-project.org/	N/A
Schrödinger	https://www.schrodinger.com/	v.2023
Molecular Operating Environment(MOE)	N/A	N/A
ImageJ	NIH	N/A
AcqKnowledge 5.0	BIOPAC System, Inc	NA
Agilent MassHunter Workstation Quantitative Analysis 10.1	Agilent	NA
Agilent MassHunter Workstation Qualitative Analysis 10.0	Agilent	NA
Others
3mm steel grinding beads	Servicebio	G103
4mm steel grinding beads	Servicebio	G104
TissueLyser II	QIAGEN	NA
MP160 Data Acquisition Hardware	BIOPAC System, Inc	MP160WS
EMG 100C Electromyogram Amplifier	BIOPAC System, Inc	EMG100C
1.3MM, 1.5M LEAD SINGLE Needle Electrodes	Rochester	NS-S81015-A-24RM
120404F, Fogarty Arterial Embolectomy Catheter, 40 cm 4Fr	Edwards Lifesciences	5884000005
Three-way valves	MINANK	YCG-S
Agilent 1290 Infinity II UPLC system	Agilent	NA
triple quadrupole (QQQ) 6470 mass spectrometer	Agilent	NA
Agilent ECLIPSE PLUS C18 column (2.1 × 5 mm, 1.8 μm)	Agilent	NA
R500 Small Animal Anesthesia Machine	RWD	NA
Biacore 8k	GE Healthcare	NA
Series S Sensor Chip CM5	Cytiva	29104988
UPLC column C18 (2.1 × 50 mm 1.7μm)	Waters	N/A

## Sheet: Table.S2
	Table S2. MRM transition and parameters for metabolities quantification
	Bile acids							5-HTP & 5-HT
	Compound	Prec Ion	Prod Ion	Frag (V)	CE (V)	Polarity		NO	Compound	Prec Ion	Prod Ion	Frag (V)	CE (V)	Polarity
1	12-Ketodeoxycholic acid (12-KLCA)	389	389	250	10	Negative		1	L-Tryptophan-d5	210.2	192.2	90	15	Positive
2	Allocholic acid (ACA)	389	389	250	10	Negative			L-Tryptophan-d5	210.2	150	90	25	Positive
3	Alloisolithocholic acid (IsoalloLCA)	375	375	250	10	Negative		2	L-Tryptophan (Trp)	205.1	188	90	5	Positive
4	Cholic acid (CA)	407	407	210	10	Negative			L-Tryptophan (Trp)	205.1	118	90	29	Positive
5	Glycochenodeoxycholic acid (GCDCA)	448	74	250	35	Negative		3	L-5-hydroxytryptophan (5-HTP)	221.1	204.1	50	5	Positive
6	Glycocholic acid hydrate (GCA)	464	74	250	39	Negative			L-5-hydroxytryptophan (5-HTP)	221.1	162.1	50	13	Positive
7	Glycohyocholic acid (GHCA)	464	74	250	39	Negative		4	Serotonin (5-HT)	177.1	160	90	9	Positive
8	Glycohyodeoxycholic acid (GHDCA)	448	74	250	35	Negative			Serotonin (5-HT)	177.1	115	90	29	Positive
9	Glycolithocholic acid (GLCA)	432	74	250	51	Negative		5	5-Hydroxyindoleacetic acid (5-HIAA)	192.1	146	110	13	Positive
10	Glycoursodeoxycholic acid (GUDCA)	448	74	250	35	Negative			5-Hydroxyindoleacetic acid (5-HIAA)	192.1	91.1	110	37	Positive
11	Hyocholic acid (HCA)	407	407	250	10	Negative
12	Hyodeoxycholic acid (HDCA)	391	391	250	10	Negative
13	Isodeoxycholic acid (iso-DCA)	391	391	250	10	Negative
14	Lithocholic acid (LCA)	375	375	250	10	Negative
15	Nordeoxycholic acid (23-NDCA)	331.3	25.1	250	10	Negative
16	Sodium chenodeoxycholate (CDCA)	391	391	250	10	Negative
17	Sodium deoxycholate (DCA)	391	391	210	10	Negative
18	Sodium glycodeoxycholate (GDCA)	448	74	250	35	Negative
19	Sodium taurocholate hydrate (TCA)	514	80	250	87	Negative
20	Sodium taurodeoxycholate hydrate (TDCA)	498	80	192	80	Negative
21	Sodium taurohyodeoxycholate hydrate (THDCA)	499	80	192	80	Negative
22	Taurochenodeoxycholic acid (TCDCA)	498	80	192	80	Negative
23	Taurodehydrocholic acid (TDHCA)	508.2	80	259	87	Negative
24	Taurohyocholic acid (THCA)	514	80	250	87	Negative
25	Taurolithocholic acid sodium salt (TLCA)	482	80	220	80	Negative
26	Tauroursodeoxycholic acid (TUDCA)	498	80	192	80	Negative
27	Ursodeoxycholic acid (UDCA)	391	391	250	10	Negative
28	Cholic acid-d4	411	411	210	51	Negative
29	Deoxycholic acid-d4	395	349.3	250	35	Negative

## Sheet: Table.S3
Table S3 Correlation between bile acid species with gastrointestinal symptoms in IBS-D patients, related to Figure 1
Group	Bile acid species	Gastrointestinal symptoms	Spearman r	P value summary
IBS-D 5-HT+	Fecal HCA species	Bristol stool scale	-0.36	***
IBS-D 5-HT+	Fecal CA species	Bristol stool scale	0.08	ns
IBS-D 5-HT+	Fecal CDCA species	Bristol stool scale	0.16	ns
IBS-D 5-HT+	Fecal DCA species	Bristol stool scale	0.01	ns
IBS-D 5-HT+	Fecal UDCA species	Bristol stool scale	0.01	ns
IBS-D 5-HT+	Fecal LCA species	Bristol stool scale	0.01	ns
IBS-D 5-HT+	Fecal DHCA species	Bristol stool scale	0.23	*
IBS-D 5-HT+	Fecal Others	Bristol stool scale	0.08	ns
IBS-D 5-HT+	Fecal HCA species	Defecation frequency	-0.27	**
IBS-D 5-HT+	Fecal CA species	Defecation frequency	0.16	ns
IBS-D 5-HT+	Fecal CDCA species	Defecation frequency	0.18	ns
IBS-D 5-HT+	Fecal DCA species	Defecation frequency	0.03	ns
IBS-D 5-HT+	Fecal UDCA species	Defecation frequency	0	ns
IBS-D 5-HT+	Fecal LCA species	Defecation frequency	0.1	ns
IBS-D 5-HT+	Fecal DHCA species	Defecation frequency	0.11	ns
IBS-D 5-HT+	Fecal Others	Defecation frequency	-0.05	ns
IBS-D 5-HT+	Fecal HCA species	Periperhal 5-HT level	-0.3	**
IBS-D 5-HT+	Fecal CA species	Periperhal 5-HT level	0.04	ns
IBS-D 5-HT+	Fecal CDCA species	Periperhal 5-HT level	0.12	ns
IBS-D 5-HT+	Fecal DCA species	Periperhal 5-HT level	-0.03	ns
IBS-D 5-HT+	Fecal UDCA species	Periperhal 5-HT level	-0.04	ns
IBS-D 5-HT+	Fecal LCA species	Periperhal 5-HT level	-0.04	ns
IBS-D 5-HT+	Fecal DHCA species	Periperhal 5-HT level	0.13	ns
IBS-D 5-HT+	Fecal Others	Periperhal 5-HT level	-0.06	ns
IBS-D 5-HT control	Fecal HCA species	Bristol stool scale	-0.04	ns
IBS-D 5-HT control	Fecal CA species	Bristol stool scale	0.02	ns
IBS-D 5-HT control	Fecal CDCA species	Bristol stool scale	0.09	ns
IBS-D 5-HT control	Fecal DCA species	Bristol stool scale	-0.08	ns
IBS-D 5-HT control	Fecal UDCA species	Bristol stool scale	0.03	ns
IBS-D 5-HT control	Fecal LCA species	Bristol stool scale	-0.04	ns
IBS-D 5-HT control	Fecal DHCA species	Bristol stool scale	0.11	ns
IBS-D 5-HT control	Fecal Others	Bristol stool scale	0.1	ns
IBS-D 5-HT control	Fecal HCA species	Defecation frequency	0.06	ns
IBS-D 5-HT control	Fecal CA species	Defecation frequency	0.07	ns
IBS-D 5-HT control	Fecal CDCA species	Defecation frequency	0.1	ns
IBS-D 5-HT control	Fecal DCA species	Defecation frequency	0.01	ns
IBS-D 5-HT control	Fecal UDCA species	Defecation frequency	0.1	ns
IBS-D 5-HT control	Fecal LCA species	Defecation frequency	0.05	ns
IBS-D 5-HT control	Fecal DHCA species	Defecation frequency	0.22	**
IBS-D 5-HT control	Fecal Others	Defecation frequency	0.05	ns
IBS-D 5-HT control	Fecal HCA species	Periperhal 5-HT level	0.03	ns
IBS-D 5-HT control	Fecal CA species	Periperhal 5-HT level	-0.03	ns
IBS-D 5-HT control	Fecal CDCA species	Periperhal 5-HT level	-0.02	ns
IBS-D 5-HT control	Fecal DCA species	Periperhal 5-HT level	0.01	ns
IBS-D 5-HT control	Fecal UDCA species	Periperhal 5-HT level	-0.12	ns
IBS-D 5-HT control	Fecal LCA species	Periperhal 5-HT level	0.1	ns
IBS-D 5-HT control	Fecal DHCA species	Periperhal 5-HT level	0.07	ns
IBS-D 5-HT control	Fecal Others	Periperhal 5-HT level	0.03	ns

## Sheet: Table.S4
Table S4 Correlation between HCA species with gastrointestinal symptoms in IBS-D patients, related to Figure 1
Bile acids	Gastrointestinal symptoms	Spearman r	P value summary
Fecal GHCA	Bristol stool scale	0.161474	ns
Fecal GHCA	Defecation frequency	0.176275	ns
Fecal GHCA	Periperhal 5-HT level	0.162178	ns
Fecal GHDCA	Bristol stool scale	0.20097	ns
Fecal GHDCA	Defecation frequency	0.113189	ns
Fecal GHDCA	Periperhal 5-HT level	0.121882	ns
Fecal HCA	Bristol stool scale	-0.134895	ns
Fecal HCA	Defecation frequency	-0.255744	*
Fecal HCA	Periperhal 5-HT level	-0.19287	ns
Fecal HDCA	Bristol stool scale	-0.31407	**
Fecal HDCA	Defecation frequency	-0.272578	*
Fecal HDCA	Periperhal 5-HT level	-0.369865	***
Fecal THCA	Bristol stool scale	-0.0168223	ns
Fecal THCA	Defecation frequency	-0.0879176	ns
Fecal THCA	Periperhal 5-HT level	-0.0615233	ns
Fecal THDCA	Bristol stool scale	-0.00186966	ns
Fecal THDCA	Defecation frequency	-0.026781	ns
Fecal THDCA	Periperhal 5-HT level	-0.11217	ns
Serum GHCA	Bristol stool scale	-0.0339443	ns
Serum GHCA	Defecation frequency	0.0730533	ns
Serum GHCA	Periperhal 5-HT level	0.104076	ns
Serum GHDCA	Bristol stool scale	0.156308	ns
Serum GHDCA	Defecation frequency	0.104953	ns
Serum GHDCA	Periperhal 5-HT level	0.104114	ns
Serum HCA	Bristol stool scale	0.111189	ns
Serum HCA	Defecation frequency	0.25148	*
Serum HCA	Periperhal 5-HT level	0.331817	**
Serum HDCA	Bristol stool scale	-0.413028	***
Serum HDCA	Defecation frequency	-0.235383	*
Serum HDCA	Periperhal 5-HT level	-0.462588	***
Serum THCA	Bristol stool scale	-0.260788	*
Serum THCA	Defecation frequency	-0.226295	*
Serum THCA	Periperhal 5-HT level	-0.140074	ns
Serum THDCA	Bristol stool scale	-0.141262	ns
Serum THDCA	Defecation frequency	-0.189787	ns
Serum THDCA	Periperhal 5-HT level	-0.166836	ns

## Sheet: Table.S5
Table S5 Correlation between HDCA with gastrointestinal symptoms in IBS-D patients, related to Figure 2
Group	HDCA	Gastrointestinal symptoms	Spearman r	P value summary
IBS-D 5-HT control	Fecal HDCA	Bristol stool scale	-0.44	***
IBS-D 5-HT control	Fecal HDCA	Defecation frequency	-0.32	***
IBS-D 5-HT control	Fecal HDCA	Periperhal 5-HT level	-0.3	***
IBS-D 5-HT control	Serum HDCA	Bristol stool scale	-0.71	***
IBS-D 5-HT control	Serum HDCA	Defecation frequency	-0.66	***
IBS-D 5-HT control	Serum HDCA	Periperhal 5-HT level	-0.61	***
IBS-D 5-HT+	Fecal HDCA	Bristol stool scale	-0.58	***
IBS-D 5-HT+	Fecal HDCA	Defecation frequency	-0.36	**
IBS-D 5-HT+	Fecal HDCA	Periperhal 5-HT level	0.04	ns
IBS-D 5-HT+	Serum HDCA	Bristol stool scale	-0.68	***
IBS-D 5-HT+	Serum HDCA	Defecation frequency	-0.65	***
IBS-D 5-HT+	Serum HDCA	Periperhal 5-HT level	-0.05	ns

## Sheet: Table.S6
Table S6. Comparison of binding energy of HDCA, THDCA, and GHDCA with TPH1(5JD6) in molecular docking.
Name	CAS	Binding energy (kcal/mol)
HDCA	83-49-8	-45.4
GHDCA	13042-33-6	-38.35
THDCA	386523	-36.85
